# Supplementary material for: Amino acid side chain induced selectivity in the hydrolysis of peptides catalyzed by a Zr(iv)-substituted Wells–Dawson type polyoxometalate
Source: Royal Society of Chemistry journal article supplement (doi:10.1039/c3dt51893k), 2013-01-01
Supplement: c3dt51893k.pdf [file c3dt51893k.pdf]

# Amino Acid Side Chain Induced Selectivity in the Hydrolysis of Peptides Catalyzed by a Zr(IV)-Substituted Wells-Dawson Type Polyoxometalate

Stef Vanhaecht, Gregory Absillis, Tatjana N. Parac-Vogt\*

Department of Chemistry, KU Leuven, Celestijnenlaan 200F, B-3001 Leuven, Belgium

## Supporting Information

Table S1. Fitting indices and hydrolysis yields at the end of the kinetic reaction.

| Dipeptide | R <sup>2</sup> -value | Hydrolysis yield | Dipeptide | R <sup>2</sup> -value | Hydrolysis yield |
|-----------|-----------------------|------------------|-----------|-----------------------|------------------|
| Gly-Gly   | 0,998                 | 100%             | Gly-Ser   | 0,99                  | 97%              |
| Gly-Ala   | 0,999                 | 73%              | Ser-Gly   | 0,986                 | 50%              |
| Ala-Gly   | 0,982                 | 73%              | Gly-Thr   | 0,997                 | 100%             |
| Gly-Val   | 0,993                 | 69%              | Gly-Tyr   | 0,974                 | 55%              |
| Gly-Leu   | 0,997                 | 70%              | Leu-Ser   | 0,997                 | 100%             |
| Gly-Ile   | 0,993                 | 94%              | Ile-Ser   | 0,966                 | 75%              |
| Gly-Phe   | 0,996                 | 96%              | Gly-Lys   | 0,996                 | 75%              |
| Gly-Asp   | 0,994                 | 95%              | Gly-Arg   | 0,996                 | 81%              |
| Gly-Asn   | 0,972                 | 92%              | Gly-His   | 0,991                 | 94%              |
| Gly-Glu   | 0,997                 | 56%              | His-Gly   | 0,995                 | 81%              |
| Gly-Gln   | 0,986                 | 77%              |           |                       |                  |

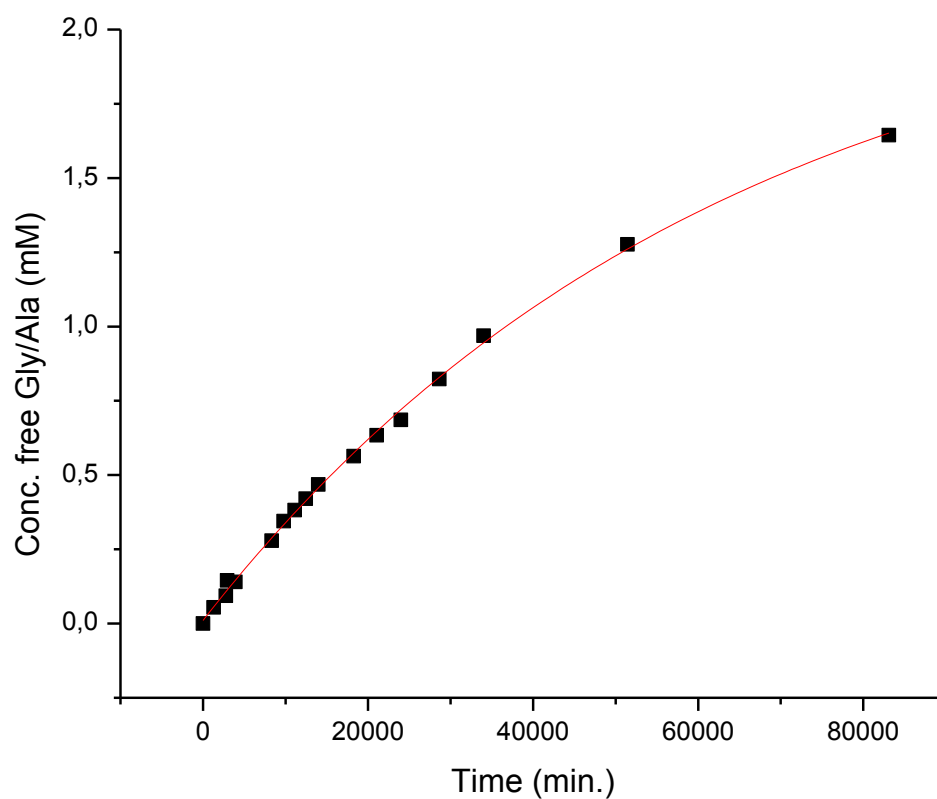

Figure S1. Concentration of the free amino acids Gly/Ala in function of time during the hydrolysis of 2mM Gly-Ala in the presence of 2mM of 1 (pD 5.0, 60 °C). An exponential fit was used to determine the  $k_{\text{obs}}$  of the hydrolysis reaction.

Table S2. Comparison of the reaction behavior of Gly-Ala and Ala-Gly in an equimolar mixture with 1(1:1, 2 mM, pD 5, 60 °C).

| Dipeptide<br>start- product | t <sub>1/2</sub> for glycine<br>formation | Max.% of cyclic product | Max.% of<br>'inversed'<br>dipeptide |
|-----------------------------|-------------------------------------------|-------------------------|-------------------------------------|
| Gly-Ala                     | 30 days                                   | 40                      | 10                                  |
| Ala-Gly                     | 15.9 days                                 | 15                      | 4                                   |

Table S3. Normalization factors for rate constant for the Gly-Aa dipeptides. (Factor = rate constant of the disappearance of the dipeptide / rate constant of growth free amino acid content)

| Dipeptide | Normalization factor |
|-----------|----------------------|
| Gly-Gly   | 1.22                 |
| Gly-Ala   | 6.34                 |
| Gly-Val   | 1.0                  |
| Gly-Leu   | 4.58                 |
| Gly-Ile   | 1.29                 |
| Gly-Phe   | 1.58                 |
| Gly-Asp   | 1.99                 |
| Gly-Glu   | 2.94                 |
| Gly-Gln   | 3.87                 |
| Gly-Thr   | 1.26                 |
| Gly-Tyr   | 1.98                 |
| Gly-His   | 1.73                 |

Table S4. Observed <sup>13</sup>C NMR chemical shift values for the dipeptide Gly-Asp both in the presence and absence of 1 at pD 5.0.

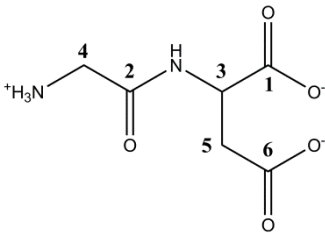

|                                          | Gly-Asp (ppm) | Gly-Asp + Zr-WD-POM (ppm) | $\Delta\delta$ (ppm) |
|------------------------------------------|---------------|---------------------------|----------------------|
| C <sub>O</sub> Asp (1)                   | 177.52        | 178.05                    | 0.53                 |
| C <sub>O</sub> Gly (2)                   | 166.45        | 166.51                    | 0.06                 |
| C <sub>O</sub> Asp (6)                   | 177.35        | 177.94                    | 0.58                 |
| C <sub><math>\alpha</math></sub> Asp (3) | 52.44         | 52.91                     | 0.46                 |
| C <sub><math>\alpha</math></sub> Gly (4) | 40.54         | 40.69                     | 0.14                 |
| C <sub><math>\beta</math></sub> Asp (5)  | 38.38         | 38.98                     | 0.60                 |

Table S5. Observed <sup>13</sup>C NMR chemical shift values for the dipeptide Gly-Glu both in the presence and absence of 1 at pD 5.0. Only the 1:2 species is found at these conditions

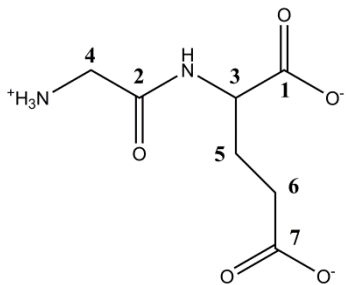

|                    | 16 mM Gly-Glu (ppm) | 16 mM Gly-Glu + 4 mM Zr-WD-POM (ppm) | $\Delta\delta$ (ppm) |
|--------------------|---------------------|--------------------------------------|----------------------|
| Co Glu (1)         | 178.08              | 178.19                               | 0.11                 |
| Co Gly (2)         | 166.48              | 166.56                               | 0.08                 |
| Co Glu (7)         | 179.86              | 180.23                               | 0.37                 |
| Ca Glu (3)         | 54.92               | 54.94                                | 0.02                 |
| Ca Gly (4)         | 40.46               | 40.56                                | 0.10                 |
| C $\beta$ Glu (5)  | 27.51               | 27.56                                | 0.05                 |
| C $\gamma$ Glu (6) | 32.31               | 32.56                                | 0.25                 |

Table S6. Observed <sup>13</sup>C NMR chemical shift values for the dipeptide Gly-Glu both in the presence and absence of 1 at pD 5.0. About 83.1 % of 1:1 and 16.9 % of 1:2 species are present at these conditions.

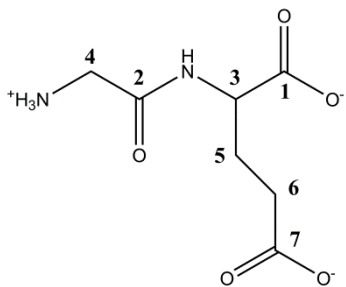

|                    | 2 mM Gly-Glu<br>(ppm) | 2 mM Gly-Glu + 0.5 mM<br>Zr-WD-POM (ppm) | $\Delta\delta$ (ppm) |
|--------------------|-----------------------|------------------------------------------|----------------------|
| Co Glu (1)         | 178.06                | 178.33                                   | 0.27                 |
| Co Gly (2)         | 166.48                | 166.46                                   | -0.02                |
| Co Glu (7)         | 179.84                | 181.22                                   | 1.38                 |
| C $\alpha$ Glu (3) | 54.93                 | 55.19                                    | 0.26                 |
| C $\alpha$ Gly (4) | 40.47                 | 40.52                                    | 0.05                 |
| C $\beta$ Glu (5)  | 27.52                 | 27.94                                    | 0.42                 |
| C $\gamma$ Glu (6) | 32.3                  | 33.32                                    | 1.02                 |



Table S7. <sup>1</sup>H shifts of three protons in Gly-His at different pD-values.

| pD  | $\alpha$ -H Gly<br>$\Delta\delta$ (ppm) | C <sub>7</sub> -H<br>$\Delta\delta$ (ppm) | C <sub>8</sub> -H<br>$\Delta\delta$ (ppm) |
|-----|-----------------------------------------|-------------------------------------------|-------------------------------------------|
| 4.0 | 0.31                                    | 0.15                                      | 0.29                                      |
| 5.0 | 0.34                                    | 0.15                                      | 0.31                                      |
| 6.5 | 0.33                                    | 0.19                                      | 0.43                                      |
| 8.0 | 0.33                                    | 0.30                                      | 0.75                                      |

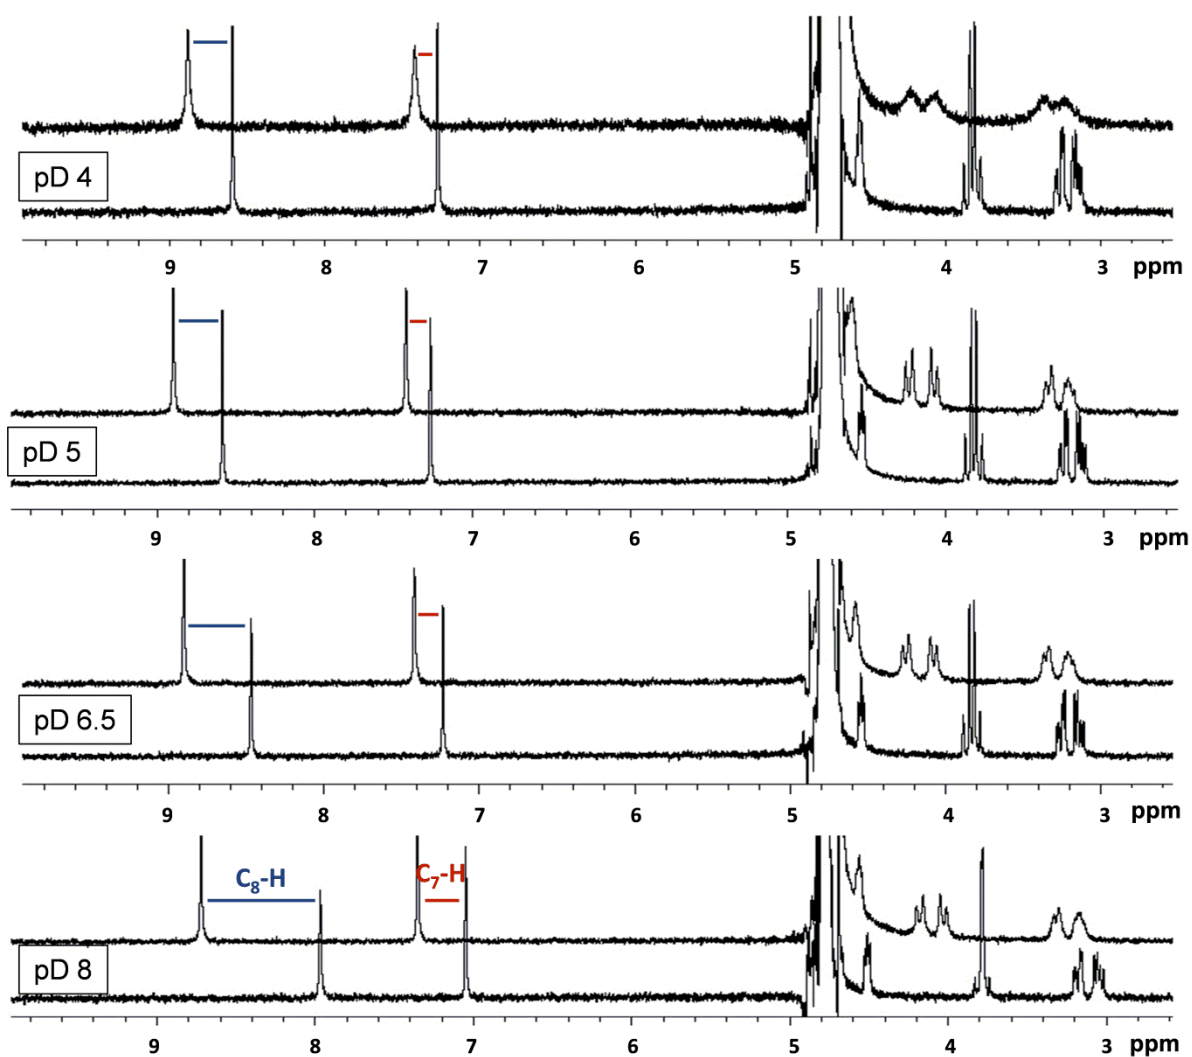

Figure S2.  $^1\text{H}$  NMR spectrum of Gly-His in the presence (upper) and absence (lower) of 1 at different pD-values.

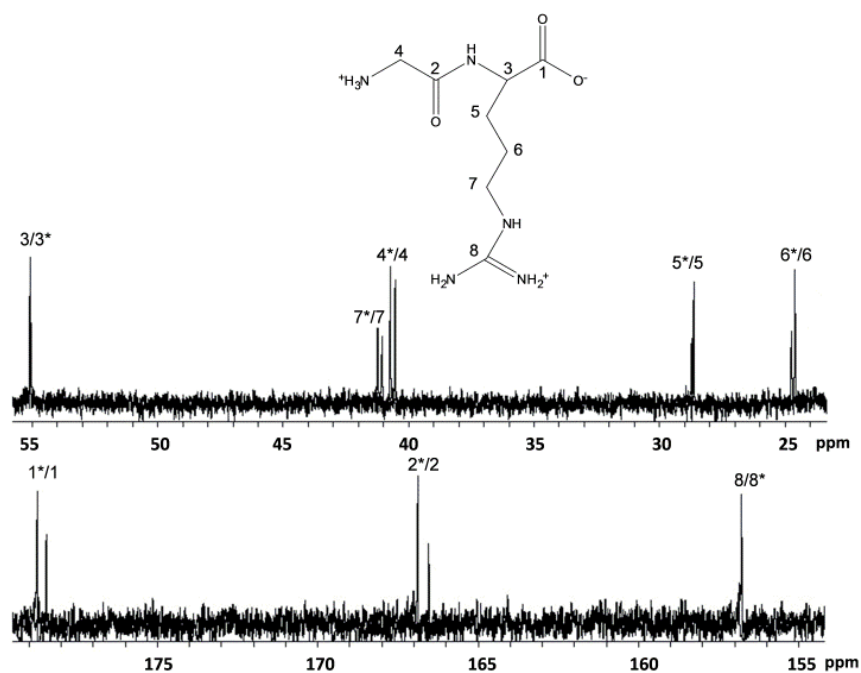

Figure S3.  $^{13}\text{C}$  NMR spectrum of Gly-Arg in the presence (\*) and absence of 1.

Table S8. Observed <sup>13</sup>C NMR chemical shift values for the dipeptide Gly-Arg both in the presence and absence of 1 at pD 5.0.

|                        | 30.0 mM Gly-Arg | 24.0 mM Gly-Arg + 8.0 mM 1 | Δ(ppm) |
|------------------------|-----------------|----------------------------|--------|
| C <sub>O</sub> Arg (1) | 178.43          | 178.71                     | 0.28   |
| C <sub>O</sub> Gly (2) | 166.51          | 166.85                     | 0.34   |
| C <sub>α</sub> Arg (3) | 55.06           | 55.02                      | -0.04  |
| C <sub>α</sub> Gly (4) | 40.41           | 41.03                      | 0.52   |
| C <sub>β</sub> Arg (5) | 28.61           | 28.69                      | 0.08   |
| C <sub>γ</sub> Arg (6) | 24.59           | 24.71                      | 0.13   |
| C <sub>δ</sub> Arg (7) | 40.71           | 41.21                      | 0.51   |
| C <sub>N</sub> Arg (8) | 156.83          | 156.76                     | -0.07  |
